# Supplementary material for: Subtly tuning one N site of benzyl-1H-triazole ligands to build mono-nuclear subunits and tri-nuclear clusters to modify polyoxometalates
Source: Royal Society of Chemistry journal article supplement (doi:10.1039/c5ce00768b), 2015-01-01
Supplement: c5ce00768b1.pdf [file c5ce00768b1.pdf]

Supplementary Material (ESI) for CrystEngComm  
This journal is © The Royal Society of Chemistry

## Subtly tuning one N site of benzyl-1H-triazole ligands to build mono-nuclear subunits and tri-nuclear clusters to modify polyoxometalates

Ai-xiang Tian,\* Ya-li Ning, Jun Ying, Guo-Cheng Liu, Xue Hou, Tian-jiao Li, Xiu-li Wang\*

Department of Chemistry, Bohai University, Liaoning Province Silicon Materials Engineering Technology

Research Centre, Jinzhou 121000, P. R. China

**Table. S1.** Selected Bond Lengths (Å) and Bond Angles (°) for Compounds 1–6.

| Compound 1  |           |             |           |
|-------------|-----------|-------------|-----------|
| Ag1-N1      | 2.150(5)  | Ag1-N6      | 2.180(5)  |
| Ag1-O6      | 2.698(4)  | Ag1-O13     | 2.824(5)  |
| Ag2-N4      | 2.144(5)  | Ag2-N2      | 2.165(5)  |
| N1-Ag1-N6   | 172.2(2)  | N4-Ag2-N2   | 171.1(2)  |
| Compound 2  |           |             |           |
| Ag1-N4      | 2.143(15) | Ag1-N3      | 2.207(14) |
| Ag1-O20     | 2.639(12) | Ag1-O13     | 2.898(11) |
| Ag2-N1      | 2.133(15) | Ag2-N5      | 2.202(16) |
| N4-Ag1-N3   | 169.7(6)  | N1-Ag2-N5   | 170.4(7)  |
| Compound 3  |           |             |           |
| Ag1-N10     | 2.125(14) | Ag1-N13     | 2.119(13) |
| Ag1-O19     | 2.662(9)  | Ag2-N9      | 2.234(13) |
| Ag2-N11     | 2.243(13) | O34-Ag2     | 2.413(10) |
| O10-Ag2     | 2.666(10) | Ag4-N4      | 2.163(14) |
| Ag3-N7      | 2.115(13) | Ag5-N1      | 2.145(13) |
| Ag4-O18     | 2.568(12) | Ag5-O9      | 2.655(11) |
| Ag5-N5      | 2.154(11) | N14-K1      | 2.204(13) |
| Ag5-O21     | 2.828(10) | K1-O23      | 2.451(12) |
| N9-Ag2-N11  | 145.9(5)  | N10-Ag1-N13 | 175.7(6)  |
| N11-Ag2-O34 | 90.6(4)   | N9-Ag2-O34  | 122.6(5)  |
| N4-Ag4-N4   | 180       | N7-Ag3-N7   | 180       |
| N4-Ag4-O18  | 89.0(4)   | N4-Ag4-O18  | 91.0(4)   |
| O18-Ag4-O18 | 180       | N1-Ag5-N5   | 171.1(5)  |
| Compound 4  |           |             |           |
| Cu1-N1      | 1.971(9)  | Cu1-N7      | 1.986(9)  |
| Cu1-N4      | 2.003(9)  | Cu1-N10     | 2.011(9)  |

\* Corresponding author. Tel.: +86-416-3400158

E-mail address: [tian@bhu.edu.cn](mailto:tian@bhu.edu.cn) (A.-X. Tian); [wangxiuli@bhu.edu.cn](mailto:wangxiuli@bhu.edu.cn) (X.-L. Wang)

**Supplementary Material (ESI) for CrystEngComm**  
**This journal is © The Royal Society of Chemistry**

---

|             |          |             |          |
|-------------|----------|-------------|----------|
| Cu1-O20     | 2.543(6) | Cu1-O23     | 2.584(6) |
| Cu2-N16     | 2.000(7) | Cu2-N13     | 2.013(8) |
| Cu2-O43     | 2.509(7) | Cu3-N28     | 1.990(8) |
| Cu3-N22     | 1.995(8) | Cu3-N19     | 2.003(9) |
| Cu3-N25     | 2.021(8) | Cu3-O51     | 2.496(6) |
| Cu3-O44     | 2.687(8) | Cu4-N40     | 1.979(9) |
| Cu4-N31     | 1.993(9) | Cu4-N34     | 2.007(8) |
| Cu4-N37     | 2.063(8) | Cu4-O12     | 2.534(8) |
| Cu4-O27     | 2.455(7) | Cu5-O24     | 2.505(8) |
| Cu5-N48     | 2.009(9) | Cu5-N44     | 1.996(8) |
| N7-Cu1-N10  | 85.7(3)  | N1-Cu1-N7   | 170.3(4) |
| N16-Cu2-N16 | 180      | N16-Cu2-N13 | 91.9(3)  |
| N28-Cu3-N22 | 178.8(3) | N28-Cu3-N19 | 90.4(3)  |
| N40-Cu4-N31 | 91.0(4)  | N40-Cu4-N34 | 176.5(3) |
| N44-Cu5-N44 | 180      | N44-Cu5-N48 | 91.6(3)  |

---

**Compound 5**

|           |            |            |           |
|-----------|------------|------------|-----------|
| O1W-Cu1   | 2.080(4)   | Cu1-N2     | 1.976(4)  |
| Cu1-N5    | 1.993(4)   | Cu1-N8     | 2.112(4)  |
| Cu1-N10   | 2.174(4)   | O2W-Cu1    | 2.580(4)  |
| Cu2-N7    | 2.021(4)   | Cu2-N7     | 2.021(4)  |
| Cu2-N11   | 2.082(5)   | Cu2-N11    | 2.082(5)  |
| Cu2-N4    | 2.354(5)   | Cu2-N4     | 2.354(5)  |
| N2-Cu1-N5 | 170.57(18) | N2-Cu1-O1W | 85.34(17) |
| N7-Cu2-N7 | 180        | N7-Cu2-N11 | 89.98(16) |

---

**Compound 6**

|             |          |             |          |
|-------------|----------|-------------|----------|
| Cu1-N8      | 1.982(8) | Cu1-N2      | 2.000(8) |
| Cu1-N11     | 2.041(8) | Cu1-N6      | 2.037(8) |
| Cu1-O63     | 2.287(6) | O2W-Cu1     | 2.346(8) |
| Cu2-O63     | 1.962(6) | Cu2-N17     | 1.987(8) |
| Cu2-N1      | 1.998(8) | O1W-Cu2     | 1.984(6) |
| O13-Cu2     | 2.414(7) | Cu2-N7      | 2.528(7) |
| Cu3-O63     | 1.929(6) | Cu3-N14     | 1.977(7) |
| Cu3-N16     | 2.016(8) | Cu3-N10     | 2.041(8) |
| O19-Cu3     | 2.184(7) | O27-Cu4     | 2.337(6) |
| Cu4-N20     | 2.007(9) | Cu4-N22     | 2.047(8) |
| O63-Cu1-O2W | 173.7(3) | N8-Cu1-N11  | 89.7(3)  |
| O63-Cu2-O1W | 173.5(3) | N17-Cu2-N1  | 174.9(4) |
| O63-Cu3-N16 | 87.4(3)  | N14-Cu3-N10 | 91.1(3)  |
| N20-Cu4-N20 | 180      | N20-Cu4-N22 | 91.9(4)  |

---

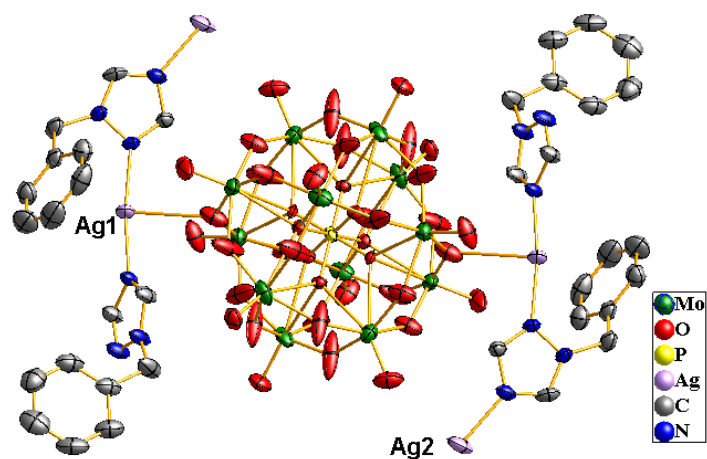

**Fig. S1.** ORTEP drawing of **1** with thermal ellipsoids at 50% probability. The H atoms have been omitted for clarity.

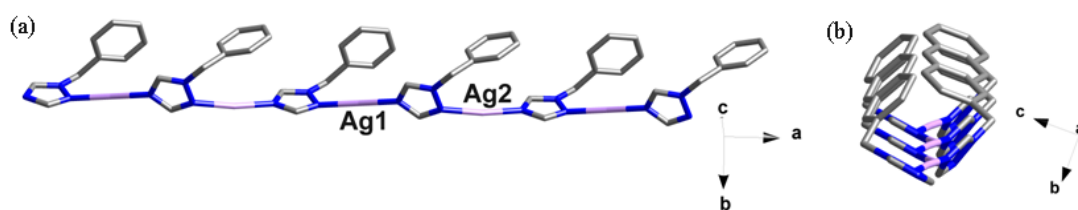

**Fig. S2.** The 1D metal-organic chain in compound **1** with a channel constructed by the twisted ligands.

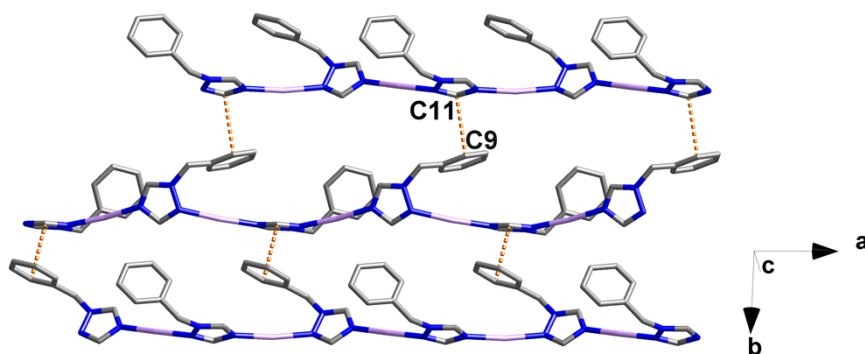

**Fig. S3.** The edge-to-face aromatic  $\pi \dots \pi$  stacking interactions of **1** between 2-btz molecules in adjacent Ag-(2-btz) chains ( $C9 \dots C11 = 3.269 \text{ \AA}$ ).

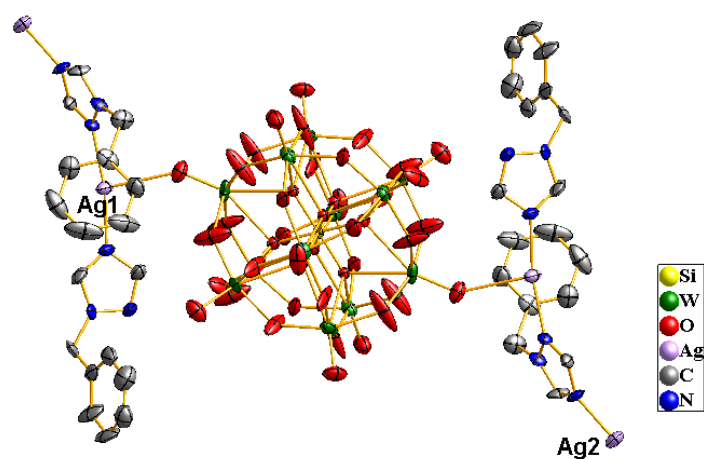

**Fig. S4.** ORTEP drawing of **2** with thermal ellipsoids at 50% probability. The H atoms have been omitted for clarity.

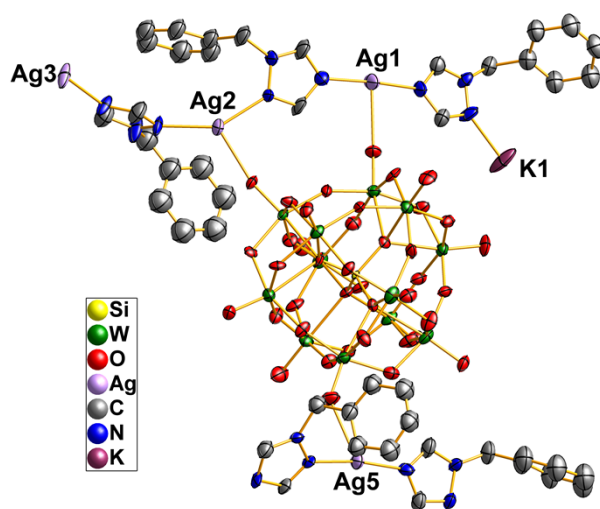

**Fig. S5.** ORTEP drawing of **3** with thermal ellipsoids at 50% probability. The H atoms have been omitted for clarity.

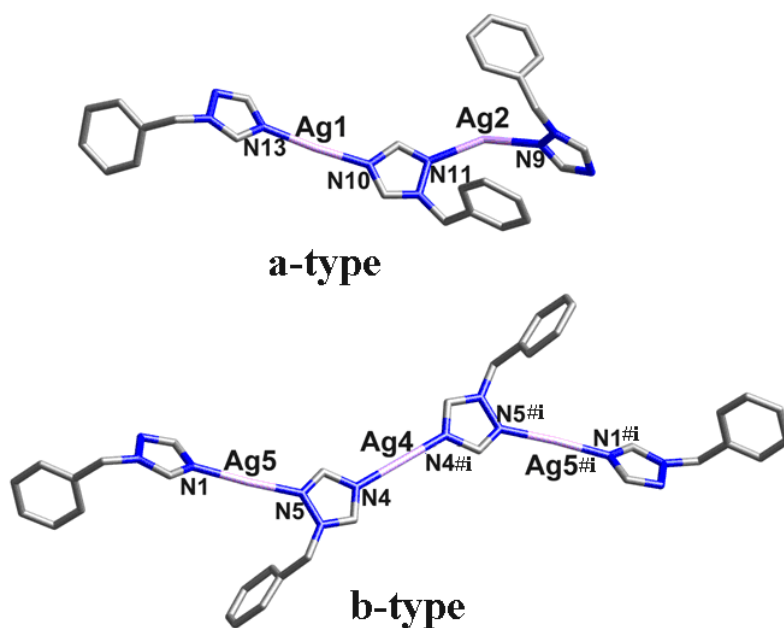

**Fig. S6.** Two types of Ag-(2-btz) subunits in compound **3** (Symmetry code #i:  $-x+1, -y+2, -z+1$ ).

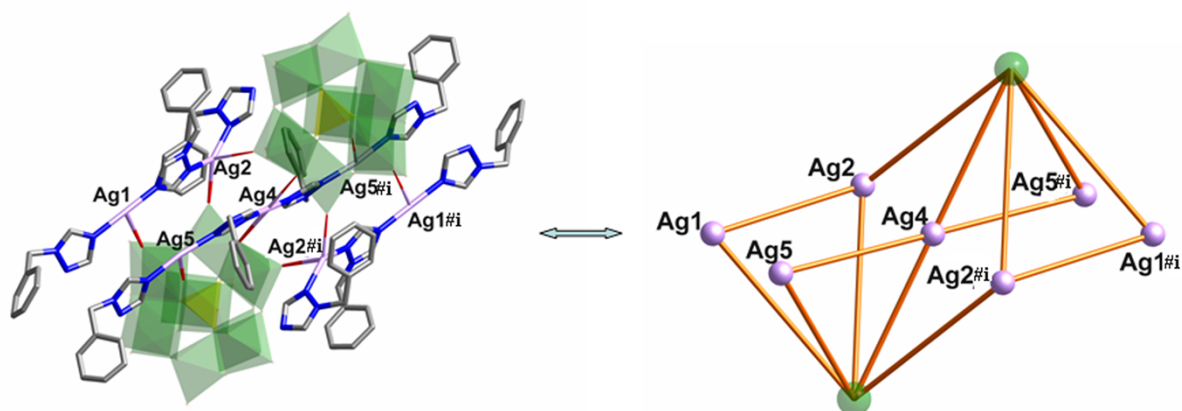

**Fig. S7.** Two  $\text{SiW}_{12}$  anions fused by Ag-(2-btz) subunits to construct an anion dimer of **3** (Symmetry code #i:  $-x+1, -y+2, -z+1$ ).

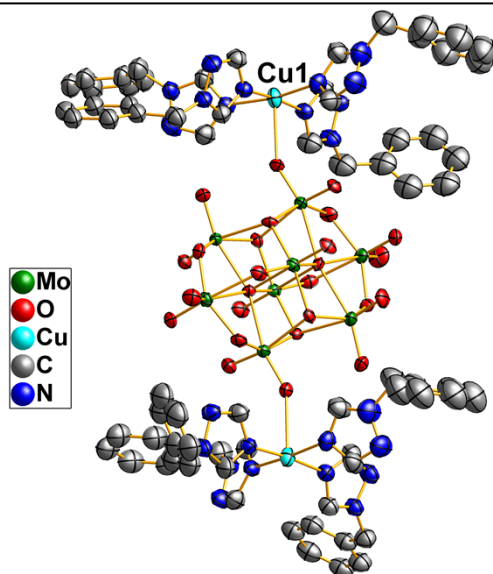

**Fig. S8.** ORTEP drawing of **4** with thermal ellipsoids at 50% probability. The H atoms have been omitted for clarity.

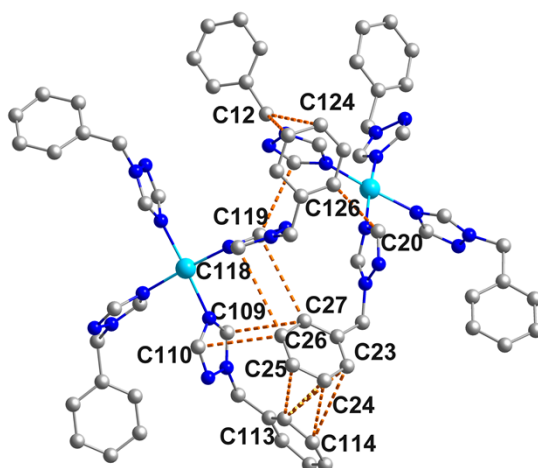

**Fig. S9.** The abundant aromatic  $\pi \dots \pi$  stacking interactions between 2-btz ligands to further stability the structure of compound **4**.

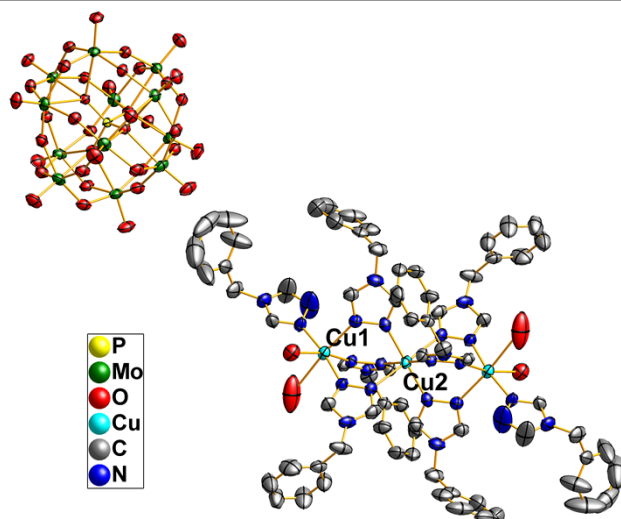

**Fig. S10.** ORTEP drawing of **5** with thermal ellipsoids at 50% probability. The H atoms have been omitted for clarity.

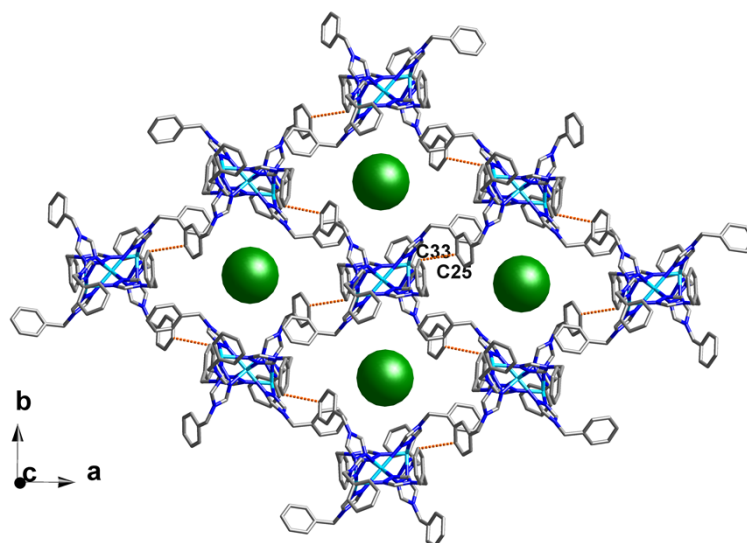

**Fig. S11.** The 2D supramolecular layer linked by aromatic  $\pi$ ... $\pi$  stacking interactions of compound **5** with anions (green) embedding in the grids.

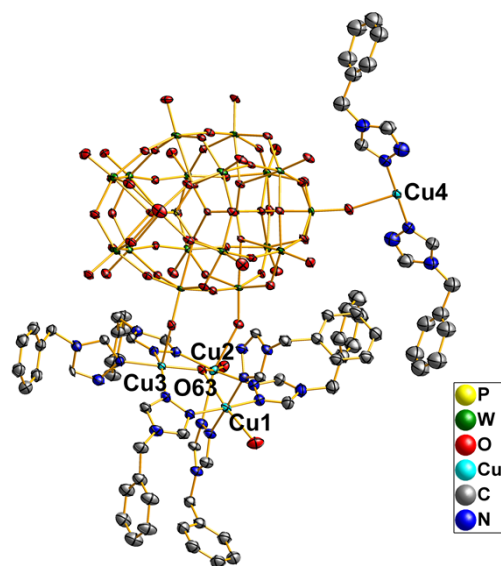

**Fig. S12.** ORTEP drawing of **6** with thermal ellipsoids at 50% probability. The H atoms have been omitted for clarity.

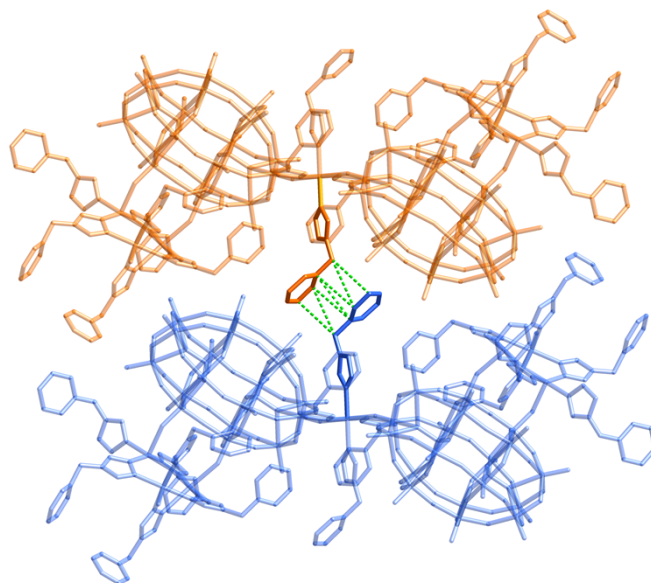

**Fig. S13.** The aromatic  $\pi \dots \pi$  stacking interactions (green dotted line) between dimers for stabilizing the structure of compound **6**.



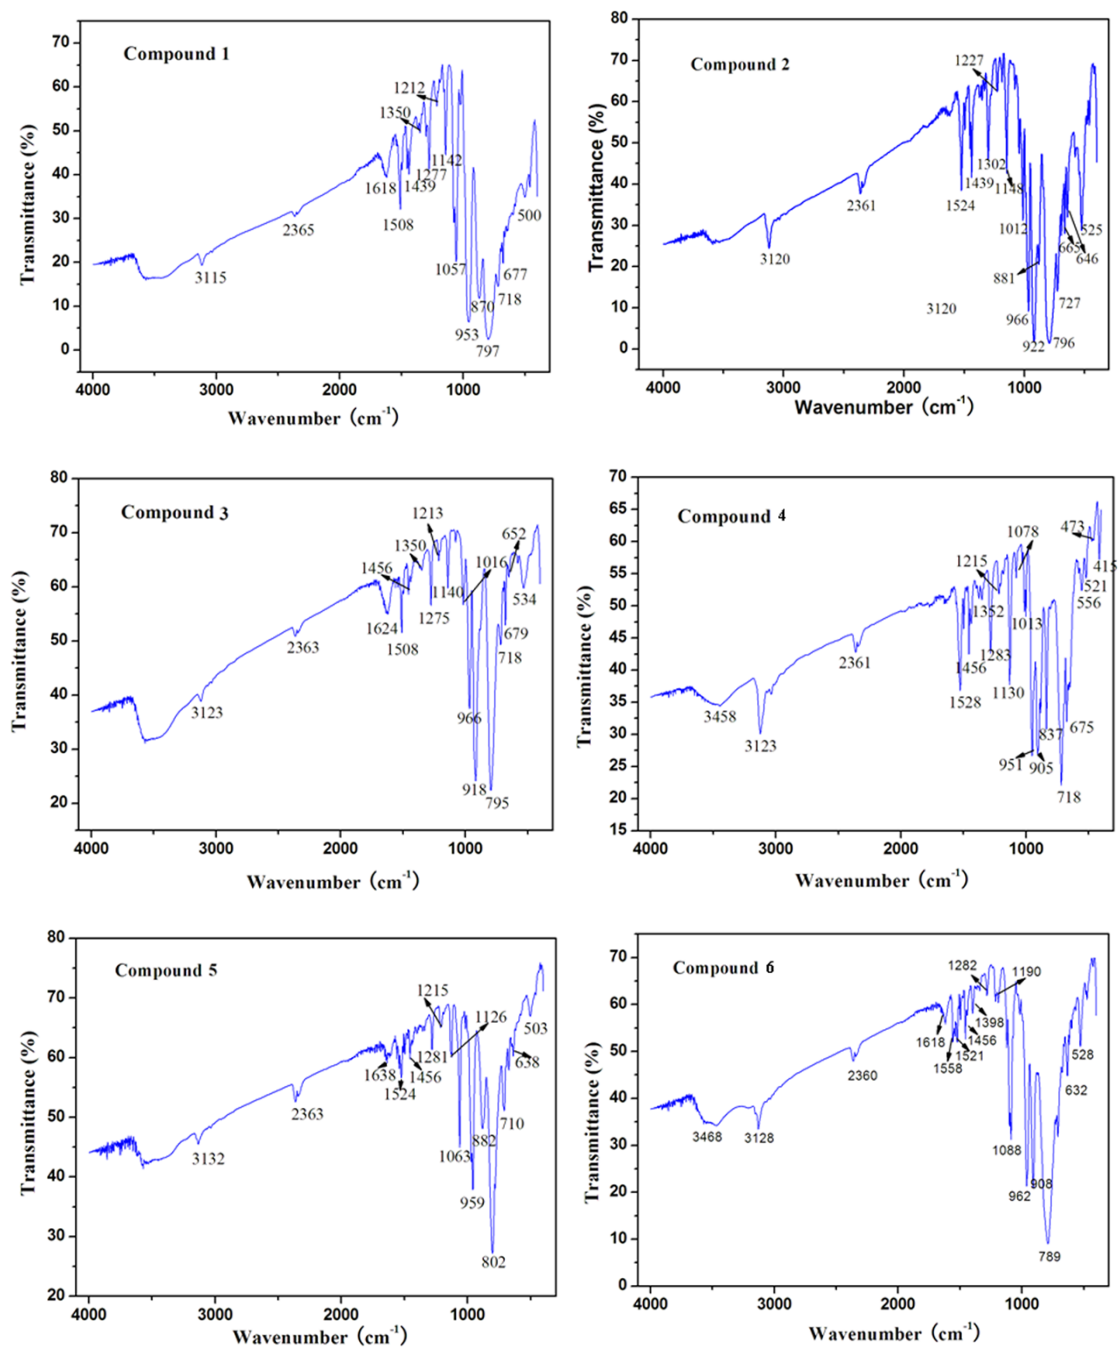

Fig. S14. The IR spectra of compounds 1–6.

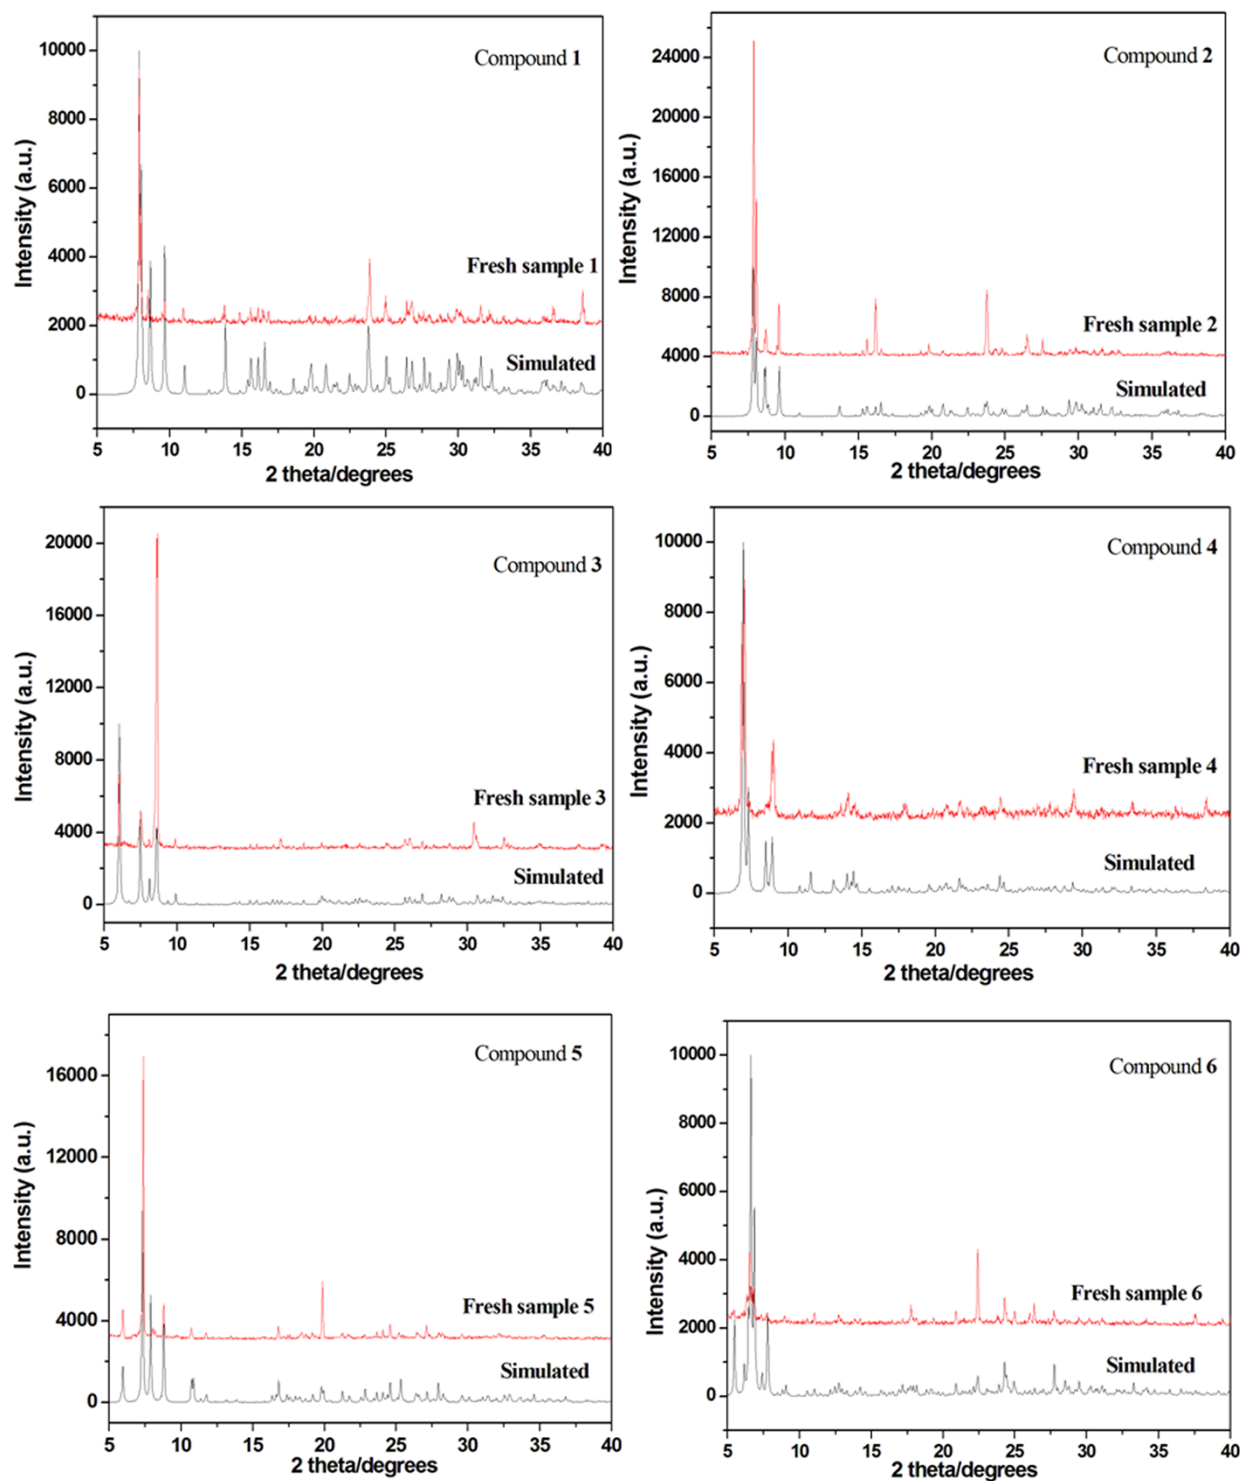

**Fig. S15.** The simulative (black line) and experimental (red line) powder X-ray diffraction patterns for compounds 1–6.

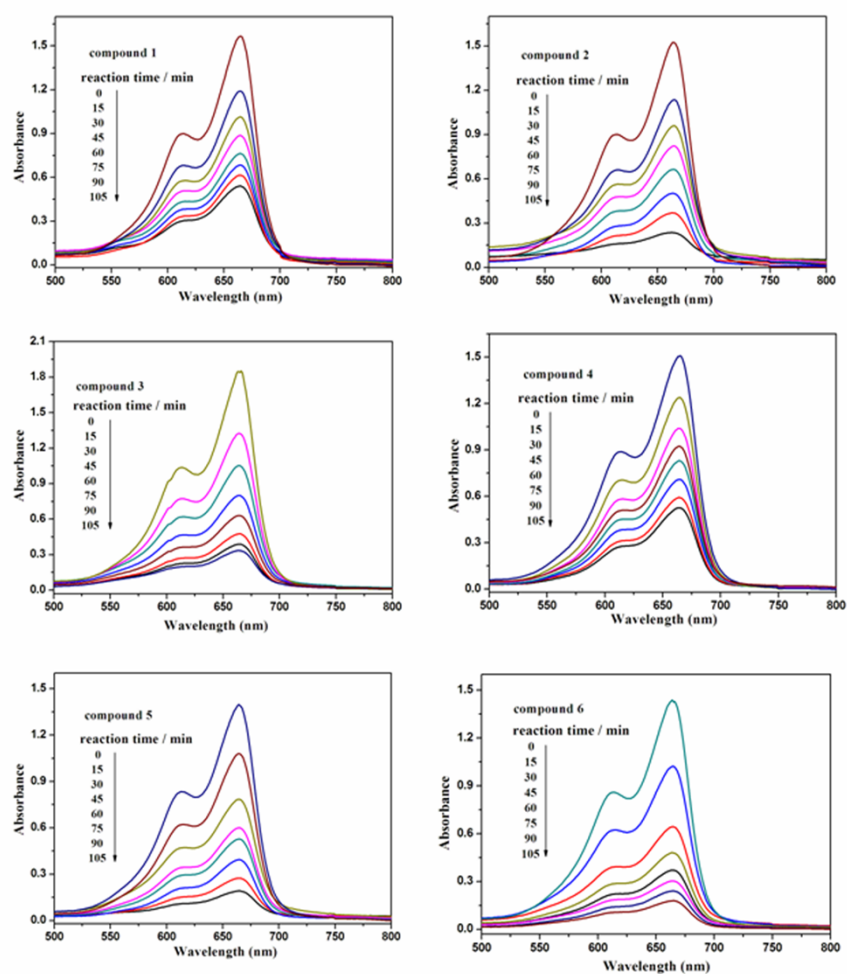

**Fig. S16.** Absorption spectra of the MB solution during the decomposition reaction under UV irradiation with the compounds 1–6 as catalyst.

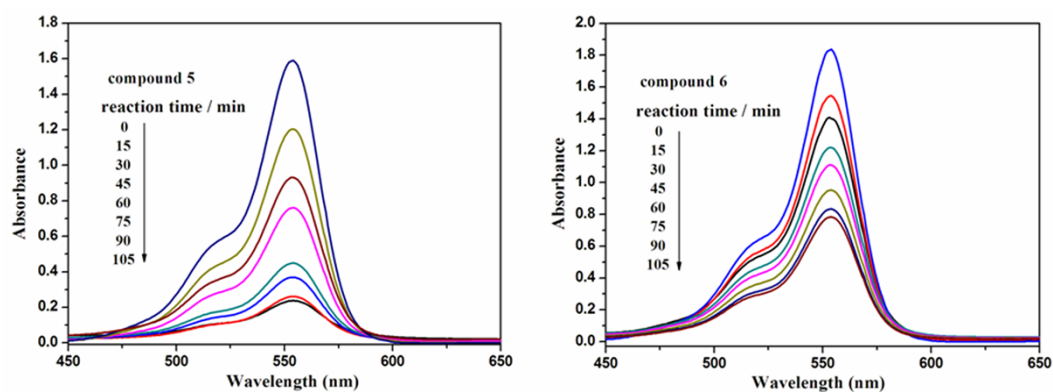

**Fig. S17.** Absorption spectra of the RhB solution during the decomposition reaction under UV irradiation with the compounds 5 and 6 as catalyst.

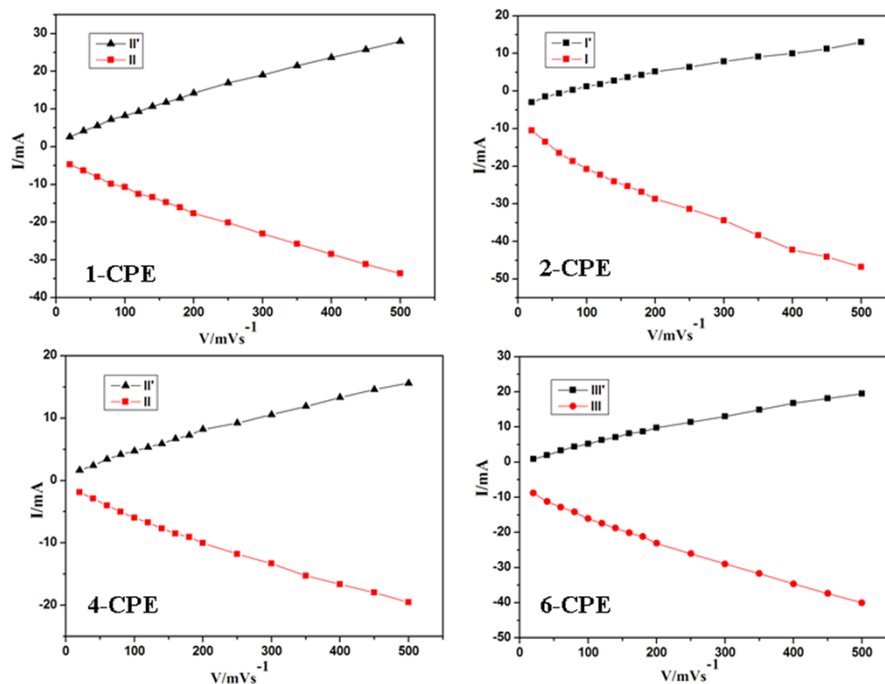

**Fig. S18.** The dependence of anodic peak and cathodic peak currents on scan rates of II-II' for 1– and 4–CPEs, I-I' for 2–CPE and III-III' for 6–CPE.

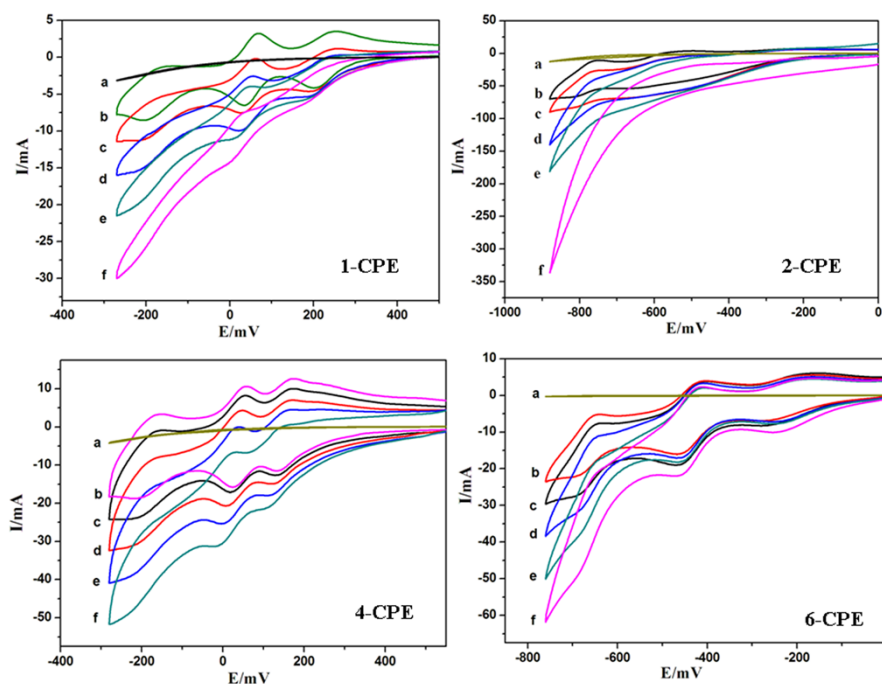

**Fig. S19.** Cyclic voltammograms of the 1–, 2–, 4– and 6–CPEs in 0.1 M  $H_2SO_4$  + 0.5 M  $Na_2SO_4$  aqueous solution containing 0(b); 2(c); 4(d); 6(e) and 8(f) mM  $NaNO_2$  and a bare CPE (a) in a 4.0 mM  $NaNO_2$  + 0.1 M  $H_2SO_4$  + 0.5 M  $Na_2SO_4$  solution. Scan rate:  $200\text{ mV}\cdot\text{s}^{-1}$ .

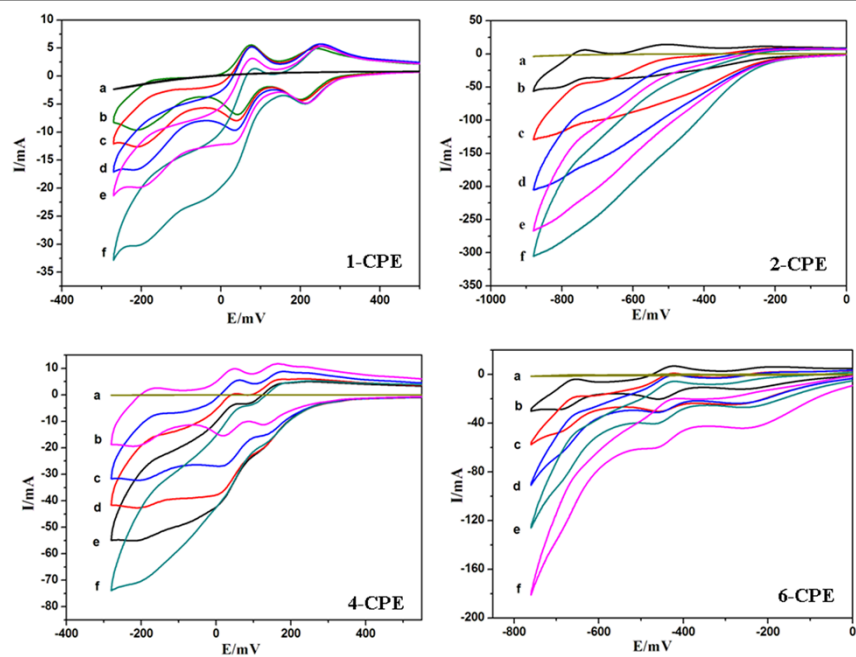

**Fig. S20.** Cyclic voltammograms of the 1-, 2-, 4- and 6-CPEs in 0.1 M  $\text{H}_2\text{SO}_4$  + 0.5 M  $\text{Na}_2\text{SO}_4$  aqueous solution containing 0(b); 2(c); 4(d); 6(e) and 8(f) mM  $\text{H}_2\text{O}_2$  and a bare CPE (a) in a 4.0 mM  $\text{H}_2\text{O}_2$  + 0.1 M  $\text{H}_2\text{SO}_4$  + 0.5 M  $\text{Na}_2\text{SO}_4$  solution. Scan rate:  $200 \text{ mV}\cdot\text{s}^{-1}$ .

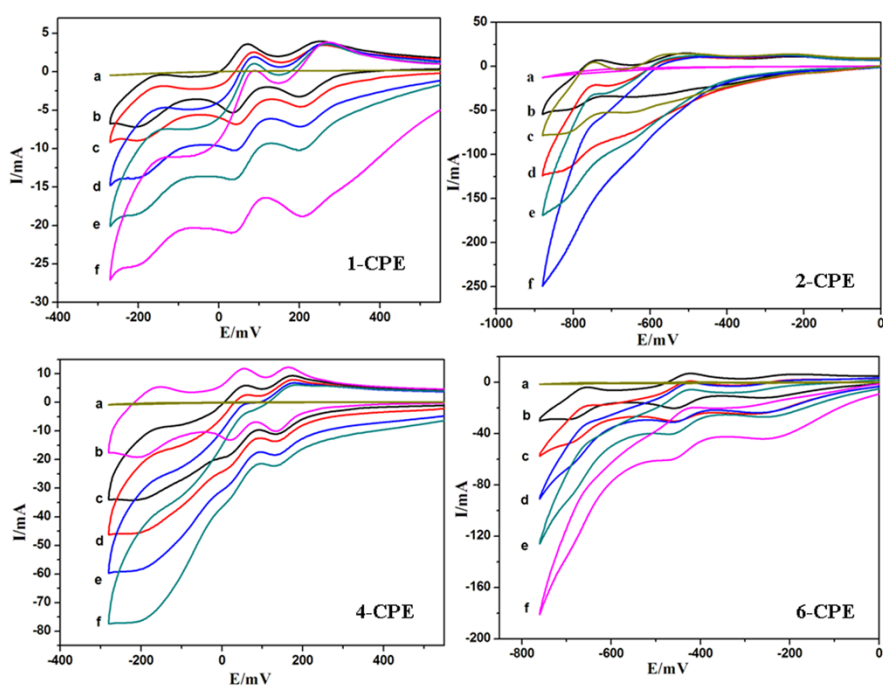

**Figure. S21.** Cyclic voltammograms of the 1-, 4- and 6-CPEs in 0.1 M  $\text{H}_2\text{SO}_4$  + 0.5 M  $\text{Na}_2\text{SO}_4$  aqueous solution containing 0(b); 2(c); 4(d); 6(e) and 8(f) mM bromate and a bare CPE (a) in a 4.0 mM bromate + 0.1 M  $\text{H}_2\text{SO}_4$  + 0.5 M  $\text{Na}_2\text{SO}_4$  solution. Scan rate:  $200 \text{ mV}\cdot\text{s}^{-1}$ .
